# Supplementary material for: Increased Risk of NAFLD in Adults with Glomerular Hyperfiltration: An 8-Year Cohort Study Based on 147,162 Koreans
Source: MDPI journal article supplement (doi:10.3390/jpm12071142), 2022-07-14
Supplement: s1 [file s1]

## Supplementary Materials

**Table S1.** Baseline characteristics of participants according to eGFR percentile groups.

| Characteristics                 | eGFR percentile groups |                  |                  |                  |                  |                  |                  |                  | <i>p</i> Value |
|---------------------------------|------------------------|------------------|------------------|------------------|------------------|------------------|------------------|------------------|----------------|
|                                 | <5                     | 5-19             | 20-34            | 35-49            | 50-64            | 65-79            | 80-95            | 95≤              |                |
| No. of subjects                 | 7307                   | 22,073           | 22,088           | 22,087           | 22,021           | 22,164           | 22,053           | 7369             |                |
| Male                            | 3487 (47.7)            | 10,509 (47.6)    | 10,539 (47.7)    | 10,470 (47.4)    | 10,526 (47.8)    | 10,533 (47.5)    | 10,513 (47.7)    | 3499 (47.5)      | <0.001         |
| Age, year                       | 36.8±7.1               | 36.7±7.0         | 36.8±6.8         | 36.4±6.9         | 35.7±7.0         | 36.5±6.7         | 35.6±6.9         | 35.5±7.0         | <0.001         |
| BMI, kg/m <sup>2</sup>          | 22.4±2.8               | 22.2±2.7         | 22.2±2.7         | 22.1±2.7         | 22.0±2.7         | 22.0±2.7         | 22.0±2.7         | 22.1±2.8         | <0.001         |
| Obesity                         | 1275 (17.5)            | 3374 (15.3)      | 3200 (14.5)      | 3133 (14.2)      | 2959 (13.5)      | 2910 (13.1)      | 2882 (13.1)      | 1059 (14.4)      | <0.001         |
| WC, cm                          | 78.3±8.5               | 78.1±8.2         | 78.2±7.9         | 78.0±8.1         | 78.0±8.1         | 78.0±7.9         | 78.0±8.2         | 78.4±8.3         | <0.001         |
| FBG, mg/dL                      | 92.5±10.7              | 92.4±9.2         | 92.5±9.5         | 92.3±9.3         | 92.3±9.9         | 92.4±10.4        | 92.2±11.0        | 92.2±12.9        | 0.009          |
| Hemoglobin A1c, %               | 5.6±0.3                | 5.5±0.3          | 5.5±0.3          | 5.5±0.3          | 5.5±0.3          | 5.5±0.3          | 5.5±0.4          | 5.5±0.5          | <0.001         |
| HOMA-IR                         | 0.97 (0.66-1.40)       | 0.98 (0.66-1.40) | 0.99 (0.67-1.42) | 1.01 (0.68-1.44) | 1.01 (0.68-1.46) | 1.01 (0.68-1.45) | 1.05 (0.70-1.49) | 1.09 (0.72-1.58) | <0.001         |
| DM                              | 91 (1.3)               | 192 (0.9)        | 238 (1.1)        | 205 (0.9)        | 226 (1.0)        | 280 (1.3)        | 91 (1.3)         | 192 (0.9)        | <0.001         |
| SBP, mmHg                       | 107.6±12.8             | 107.0±12.4       | 106.8±12.3       | 106.8±12.3       | 106.5±12.1       | 106.4±12.1       | 106.3±12.0       | 106.4±12.5       | <0.001         |
| DBP, mmHg                       | 68.91±9.4              | 68.37±9.2        | 68.23±9.2        | 68.07±9.2        | 67.94±9.1        | 67.79±9.0        | 67.62±9.1        | 68.91±9.4        | <0.001         |
| Hypertension                    | 569 (7.8)              | 1311 (5.9)       | 1235 (5.6)       | 1216 (5.5)       | 1201 (5.5)       | 1150 (5.2)       | 569 (7.8)        | 1311 (5.9)       | <0.001         |
| AST, IU/L                       | 19 (16-23)             | 19 (16-22)       | 18 (16-22)       | 18 (16-22)       | 18 (16-22)       | 18 (15-22)       | 18 (15-21)       | 18 (15-22)       | <0.001         |
| ALT, IU/L                       | 15 (12-21)             | 15 (12-21)       | 15 (12-21)       | 15 (12-21)       | 15 (11-21)       | 15 (12-22)       | 15 (11-21)       | 16 (12-23)       | <0.001         |
| TC, mg/dL                       | 193.9±32.6             | 191.2±32.1       | 189.6±31.6       | 188.7±31.3       | 187.7±31.2       | 186.4±31.2       | 184.8±31.3       | 183.8±33.3       | <0.001         |
| Triglyceride, mg/dL             | 79 (60-109)            | 78 (58-107)      | 78 (58-107)      | 77 (58-107)      | 77 (58-106)      | 78 (58-108)      | 77 (57-109)      | 81 (59-116)      | <0.001         |
| LDL, mg/dL                      | 117.8±30.6             | 115.8±29.9       | 115.3±29.5       | 114.6±29.2       | 113.6±29.1       | 113.3±28.8       | 112.1±28.9       | 111.4±29.7       | <0.001         |
| HDL, mg/dL                      | 62.4±15.2              | 62.2±14.6        | 61.7±14.3        | 61.7±14.4        | 62.0±14.5        | 61.6±14.4        | 61.6±14.5        | 62.0±15.0        | <0.001         |
| Dyslipidemia                    | 986 (13.5)             | 2563 (11.6)      | 2441 (11.1)      | 2269 (10.3)      | 2217 (10.1)      | 2148 (9.7)       | 986 (13.5)       | 2563 (11.6)      | <0.001         |
| hs-CRP, mg/dL                   | 0.03 (0.02-0.06)       | 0.03 (0.02-0.06) | 0.03 (0.02-0.06) | 0.03 (0.02-0.06) | 0.03 (0.02-0.07) | 0.03 (0.02-0.07) | 0.04 (0.02-0.07) | 0.04 (0.02-0.08) | <0.001         |
| Creatinine, mg/dL               | 1.0 (0.9-1.2)          | 0.8 (0.8-1.1)    | 0.8 (0.7-1.0)    | 0.7 (0.7-1.0)    | 0.7 (0.7-1.0)    | 0.7 (0.6-0.9)    | 0.6 (0.6-0.8)    | 0.6 (0.5-0.8)    | <0.001         |
| eGFR, mL/min/1.73m <sup>2</sup> | 78.6±7.0               | 89.2±7.2         | 98.5±10.5        | 103.8±9.00       | 107.4±8.4        | 112.3±6.6        | 115.4±6.6        | 121.4±7.7        | <0.001         |
| Alcohol intake, g/day           | 4 (2-10)               | 4 (2-11)         | 4 (2-11)         | 4 (2-11)         | 4 (2-11)         | 4 (2-11)         | 4 (2-13)         | 4 (2-13)         | 0.040          |
| Current smoker                  | 1035 (14.2)            | 3398 (15.4)      | 3620 (16.4)      | 3546 (16.1)      | 3706 (16.8)      | 3941 (17.8)      | 3867 (17.5)      | 1284 (17.4)      | <0.001         |
| Exercise status                 |                        |                  |                  |                  |                  |                  |                  |                  | <0.001         |
| < 3 times/week                  | 5811 (79.5)            | 18,150 (82.2)    | 18,454 (83.6)    | 18,728 (84.8)    | 18,791 (85.3)    | 18,963 (85.6)    | 19,122 (86.7)    | 6438 (87.4)      |                |
| ≥ 3 times/week                  | 1249 (17.1)            | 3228 (14.6)      | 2976 (13.5)      | 2688 (12.2)      | 2666 (12.1)      | 2602 (11.7)      | 2377 (10.8)      | 757 (10.3)       |                |

|       |                 |                  |                  |                 |                  |                  |                  |                  |        |
|-------|-----------------|------------------|------------------|-----------------|------------------|------------------|------------------|------------------|--------|
| NFS   | -2.90±0.96      | -2.96±0.94       | -3.00±0.94       | -3.04±0.95      | -3.09±0.94       | -3.09±0.94       | -3.17±0.96       | -3.20±0.97       | <0.001 |
| FIB-4 | 0.75 (0.6-0.94) | 0.72 (0.58-0.91) | 0.71 (0.57-0.89) | 0.7 (0.56-0.87) | 0.68 (0.55-0.85) | 0.68 (0.55-0.86) | 0.65 (0.53-0.82) | 0.64 (0.51-0.81) | <0.001 |

Values are expressed as n (%), mean±standard deviation, percentage, or median (interquartile range).

ALT: alanine aminotransferase, AST: aspartate aminotransferase, BMI: body mass index, DM: diabetes mellitus, eGFR: estimated glomerular filtration rate, FBG: fasting blood glucose, FIB-4: fibrosis-4, HDL: high density lipoprotein, hs-CRP: high-sensitivity C-reactive protein, HOMA-IR: homeostasis model assessment of insulin resistance, LDL: low density lipoprotein, NAFLD: nonalcoholic fatty liver disease, NFS: NAFLD fibrosis score, SBP: systolic blood pressure, TC: total cholesterol, WC: waist circumference.

**Table S2.** Incidence and hazard ratios for development of NAFLD according to eGFR percentile groups.

| Percentile Group of eGFR | No. of Participants | Cases, <i>n</i> | IR, per 1000 PY     | HR (95% CI)      |                  |                  |                  |
|--------------------------|---------------------|-----------------|---------------------|------------------|------------------|------------------|------------------|
|                          |                     |                 |                     | Model 1          | Model 2          | Model 3          | Model 4          |
| <5                       | 7307                | 1462            | 46.09 (43.79–48.51) | 0.85 (0.80–0.90) | 0.88 (0.83–0.93) | 0.88 (0.83–0.94) | 0.89 (0.84–0.95) |
| 5–19                     | 22,073              | 4436            | 47.02 (45.66–48.43) | 0.91 (0.87–0.95) | 0.94 (0.90–0.98) | 0.94 (0.90–0.98) | 0.95 (0.91–0.99) |
| 20–34                    | 22,088              | 4478            | 47.63 (46.26–49.05) | 0.95 (0.91–0.99) | 0.96 (0.92–1.01) | 0.97 (0.93–1.01) | 0.98 (0.93–1.02) |
| 35–49                    | 22,087              | 4445            | 48.51 (47.1–49.95)  | 0.99 (0.95–1.03) | 0.99 (0.95–1.03) | 0.99 (0.95–1.04) | 0.99 (0.95–1.03) |
| 50–64                    | 22,021              | 4245            | 47.34 (45.94–48.78) | 1 (reference)    | 1 (reference)    | 1 (reference)    | 1 (reference)    |
| 65–79                    | 22,164              | 4514            | 51.03 (49.56–52.54) | 1.09 (1.04–1.13) | 1.06 (1.02–1.11) | 1.07 (1.02–1.11) | 1.07 (1.03–1.12) |
| 80–94                    | 22,053              | 4402            | 52.71 (51.17–54.29) | 1.17 (1.12–1.22) | 1.11 (1.07–1.16) | 1.11 (1.07–1.16) | 1.12 (1.07–1.17) |
| ≥95                      | 7369                | 1428            | 56.26 (53.41–59.25) | 1.35 (1.27–1.44) | 1.21 (1.14–1.28) | 1.21 (1.14–1.29) | 1.20 (1.13–1.28) |

Model 1: adjusted for age, sex, center, and muscle mass. Model 2: additionally adjusted for BMI, smoking status, regular exercise, history of diabetes, dyslipidemia, and hypertension. Model 3: additionally adjusted for hs-CRP and HOMA-IR. Model 4: additionally adjusted for alcohol intake and ALT. BMI: body mass index, CI: confidence interval, eGFR: estimated glomerular filtration rate, HOMA-IR: homeostasis model assessment of insulin resistance, HR: hazard ratio, hs-CRP: high-sensitivity C-reactive protein, IR: incidence rate, NAFLD: nonalcoholic fatty liver disease, PY: person years.

**Table S3.** Risk of advanced liver fibrosis based on NFS according to eGFR percentile in patients with NAFLD.

| Percentile Group of eGFR | No. of Participants | Cases, <i>n</i> | IR, per 1000 PY     | HR (95% CI)      |                  |                  |                  |
|--------------------------|---------------------|-----------------|---------------------|------------------|------------------|------------------|------------------|
|                          |                     |                 |                     | Model 1          | Model 2          | Model 3          | Model 4          |
| <5                       | 512                 | 136             | 65.21 (55.13–77.15) | 0.95 (0.77–1.17) | 0.95 (0.77–1.18) | 0.96 (0.78–1.19) | 1.01 (0.81–1.26) |
| 5–19                     | 1382                | 349             | 61.38 (55.27–68.17) | 0.97 (0.82–1.14) | 1.03 (0.88–1.21) | 1.05 (0.89–1.24) | 1.06 (0.89–1.27) |
| 20–34                    | 1236                | 301             | 58.85 (52.57–65.89) | 0.95 (0.80–1.12) | 1.03 (0.87–1.22) | 1.05 (0.88–1.25) | 1.06 (0.88–1.26) |
| 35–49                    | 1185                | 296             | 61.31 (54.71–68.71) | 1.02 (0.86–1.21) | 1.08 (0.91–1.28) | 1.09 (0.92–1.29) | 1.10 (0.92–1.32) |
| 50–64                    | 1037                | 252             | 58.77 (51.94–66.49) | 1 (reference)    | 1 (reference)    | 1 (reference)    | 1 (reference)    |
| 65–79                    | 1063                | 259             | 61.24 (54.22–69.17) | 1.03 (0.87–1.23) | 1.06 (0.89–1.26) | 1.08 (0.90–1.29) | 1.12 (0.93–1.34) |
| 80–94                    | 976                 | 253             | 66.92 (59.16–75.69) | 1.18 (0.99–1.41) | 1.11 (0.94–1.33) | 1.15 (0.97–1.38) | 1.17 (0.97–1.41) |
| ≥95                      | 304                 | 83              | 77.36 (62.39–95.93) | 1.50 (1.17–1.93) | 1.37 (1.07–1.76) | 1.42 (1.11–1.82) | 1.43 (1.10–1.86) |

Model 1: adjusted for age, sex, center, and muscle mass. Model 2: additionally adjusted for BMI, smoking status, regular exercise, history of diabetes, dyslipidemia, and hypertension. Model 3: additionally adjusted for hs-CRP and HOMA-IR. Model 4: additionally adjusted for alcohol intake and ALT. BMI: body mass index, CI: confidence interval, eGFR: estimated glomerular filtration rate, HOMA-IR: homeostasis model assessment of insulin resistance, HR: hazard ratio, hs-CRP: high-sensitivity C-reactive protein, IR: incidence rate, NAFLD: nonalcoholic fatty liver disease, PY: person years.

**Table S4.** Risk of advanced liver fibrosis based on FIB-4 by hyperfiltration status in patient with NAFLD.

| eGFR status at baseline | No. of participants | Cases, n | IR, per 1,000 PY    | HR (95% CI)      |                  |                  |
|-------------------------|---------------------|----------|---------------------|------------------|------------------|------------------|
|                         |                     |          |                     | Model 1          | Model 2          | Model 3          |
| Non-GHF <sup>a</sup>    | 6,446               | 1,128    | 44.02 (41.52-46.66) | 1 (reference)    | 1 (reference)    | 1 (reference)    |
| GHF <sup>a</sup>        | 304                 | 83       | 77.36 (62.39-95.93) | 1.14 (0.85-1.54) | 1.17 (0.87-1.57) | 1.21 (0.90-1.64) |

<sup>a</sup> GHF was defined as an eGFR value above the 95<sup>th</sup> percentile for each sex and age group of study participants.

Model 1: adjusted for age, sex, center, and muscle mass.

Model 2: additionally adjusted for BMI, smoking status, regular exercise, history of diabetes, dyslipidemia, and hypertension.

Model 3: additionally adjusted for hs-CRP and HOMA-IR.

BMI, body mass index; CI, confidence interval; eGFR, estimated glomerular filtration rate; FIB-4, fibrosis-4; GHF, glomerular hyperfiltration; HOMA-IR, homeostasis model assessment of insulin resistance; HR, hazard ratio; hs-CRP, high-sensitivity C-reactive protein; IR, incidence rate; NAFLD, nonalcoholic fatty liver disease; NFS, NAFLD fibrosis score; Non-GHF, non- glomerular hyperfiltration; PY person-years.

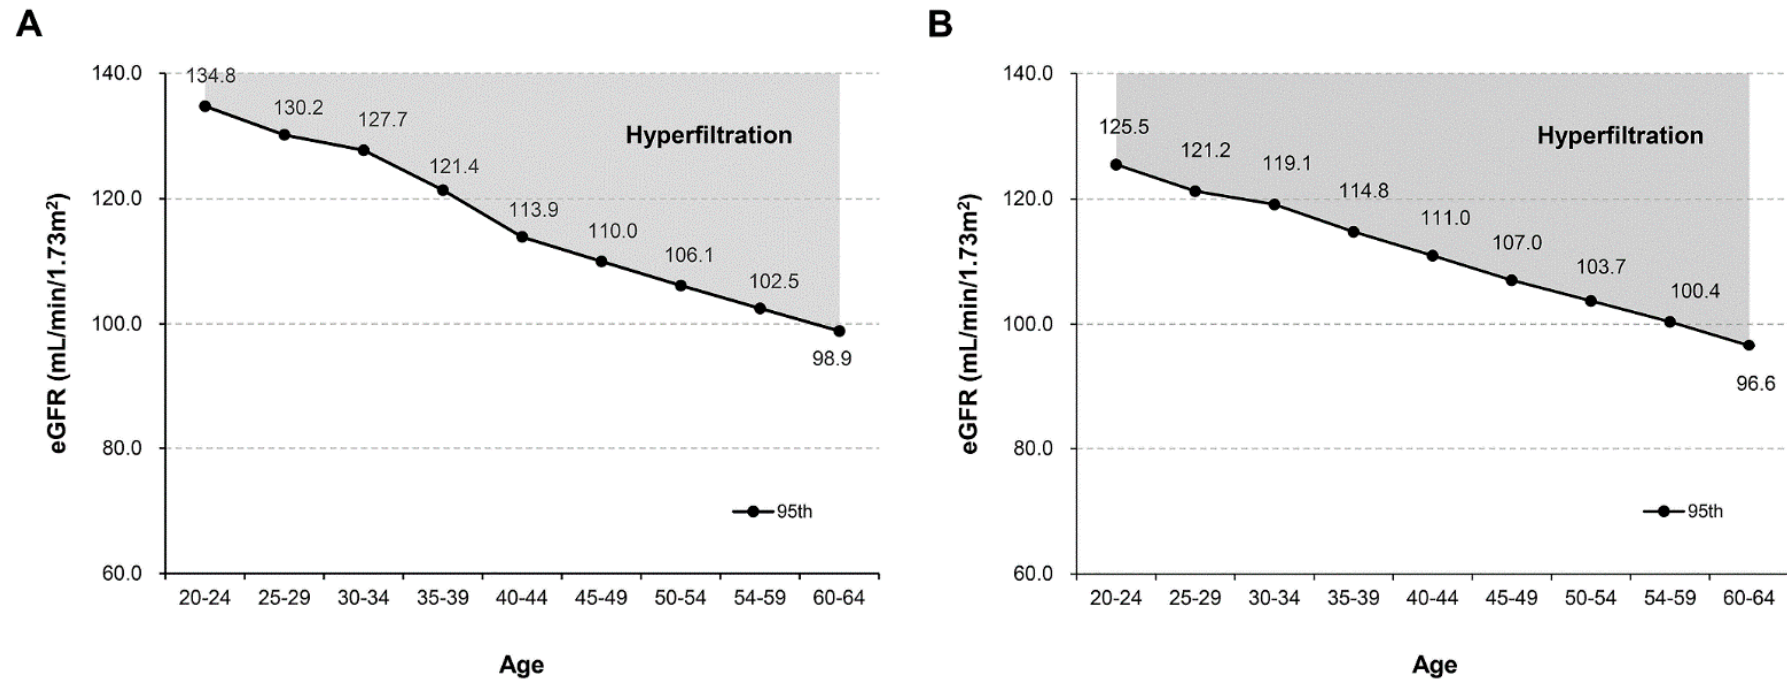

**Figure S1.** Distribution of eGFR corresponding to the definition of hyperfiltration according to age in (A) male and (B) female.  
eGFR: estimated glomerular filtration rate.

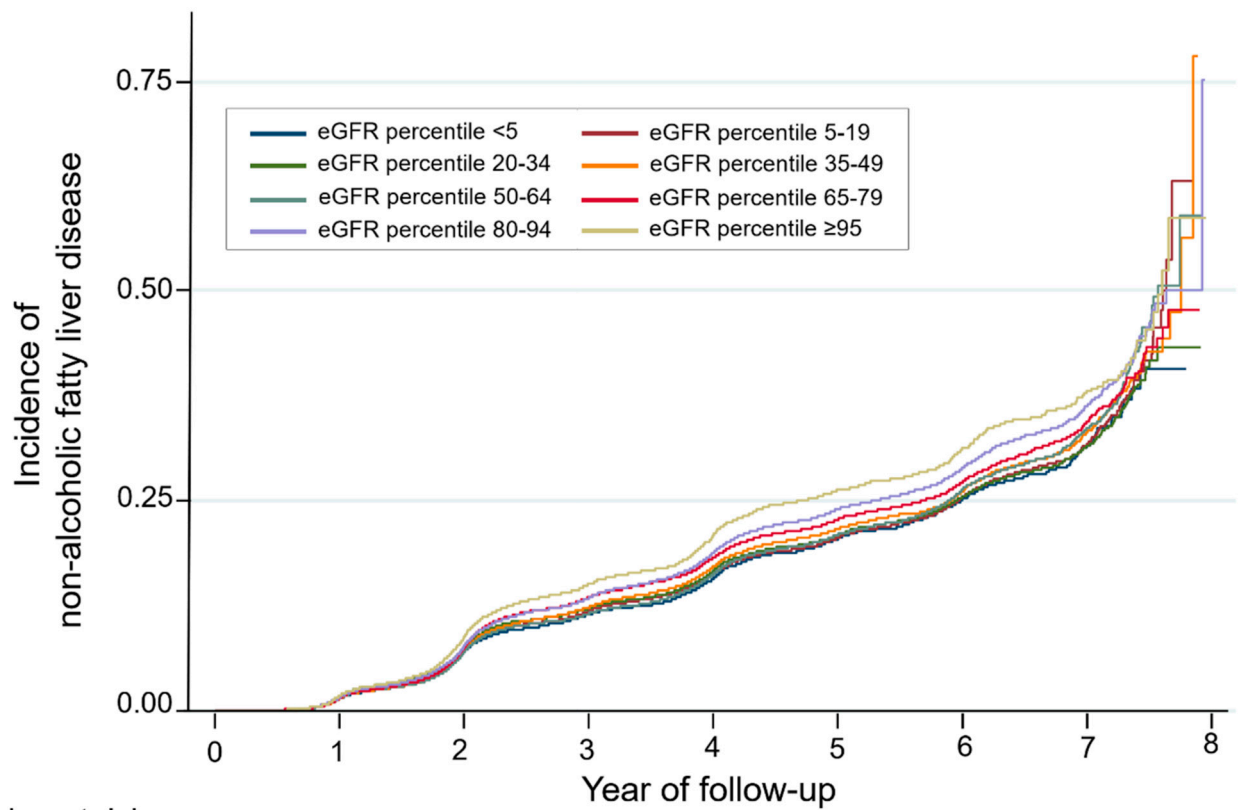

#### Number at risk

|                       |        |        |        |        |        |       |       |       |
|-----------------------|--------|--------|--------|--------|--------|-------|-------|-------|
| eGFR percentile <5    | 7,333  | 7,069  | 6,095  | 5,221  | 4,155  | 3,174 | 1,810 | 394   |
| eGFR percentile 5-19  | 22,103 | 21,332 | 18,166 | 15,445 | 12,137 | 9,255 | 5,205 | 1,128 |
| eGFR percentile 20-34 | 22,213 | 21,416 | 18,083 | 15,205 | 12,030 | 9,236 | 5,534 | 1,402 |
| eGFR percentile 35-49 | 22,047 | 21,277 | 17,851 | 14,697 | 11,397 | 8,622 | 4,822 | 1,037 |
| eGFR percentile 50-64 | 22,156 | 21,409 | 17,769 | 14,550 | 11,083 | 8,129 | 4,474 | 1,064 |
| eGFR percentile 65-79 | 22,130 | 21,293 | 17,363 | 13,691 | 10,555 | 7,939 | 4,676 | 1,151 |
| eGFR percentile 80-94 | 22,109 | 21,207 | 16,663 | 12,880 | 9,439  | 6,831 | 3,861 | 978   |
| eGFR percentile ≥95   | 7,388  | 7,027  | 5,168  | 3,623  | 2,511  | 1,774 | 980   | 268   |

**Figure S2.** Cumulative incidence of NAFLD according to eGFR percentile groups at baseline during the follow-up period. NAFLD: nonalcoholic fatty liver disease, eGFR: estimated glomerular filtration rate.
